# Supplementary material for: Breast Cancer and Smell: Hints from Epigenetic and Functional Alteration of the Olfaction
Source: Research Square preprint supplement (doi:10.21203/rs.3.rs-910345/v1), 2021-09-30
Supplement: Supplementary file 1 [file c9b5fae1ee2175fc3649201c.docx]

**Table 1׀** **Result of smell identification test between breast cancer patients and controls**. G1-G4 were the four groups of local odorants used for forced choice test to correctly identify the test odorants. With respect to three test odorants (ginger, mjmoh & dkoh) there was significant smell identification impairment as compared to healthy controls (*p-*value : 0.002, 0.000. & 0.006 respectively). The difference with respect to lemon was not significant (*p*-value=0.057). Statistical analysis was done using One Way ANOVA. A *p-* value of ≤ 0.05 was considered statistically significant difference.

|  | | Sum of Squares | df | Mean Square | F | Sig. |
| --- | --- | --- | --- | --- | --- | --- |
| Reslut Smell test G1 {ginger} | Between Groups | 2.250 | 1 | 2.250 | 11.316 | .002 |
| Within Groups | 8.550 | 43 | .199 |  |  |
| Total | 10.800 | 44 |  |  |  |
| Reslut Smell test G2 {lemon} | Between Groups | .538 | 1 | .538 | 3.829 | .057 |
| Within Groups | 6.040 | 43 | .140 |  |  |
| Total | 6.578 | 44 |  |  |  |
| Reslut Smell test G3 {mjmoh} | Between Groups | 2.454 | 1 | 2.454 | 15.544 | .000 |
| Within Groups | 6.790 | 43 | .158 |  |  |
| Total | 9.244 | 44 |  |  |  |
| Reslut Smell test G4 {dkoh} | Between Groups | 1.068 | 1 | 1.068 | 8.333 | .006 |
| Within Groups | 5.510 | 43 | .128 |  |  |
| Total | 6.578 | 44 |  |  |  |
